# Supplementary material for: Well-designed sunlight-like Bi 3+ -activated white-light phosphor for general lighting
Source: Royal Society of Chemistry journal article supplement (doi:10.1039/d5tc01823d), 2025-01-01
Supplement: d5tc01823d1.pdf [file d5tc01823d1.pdf]

## Supporting Information

### **Well-designed Sunlight-like Bi<sup>3+</sup>-activated White-light Phosphor for General Lighting**

Xujiang Liu, Xiaole Zhang, Lijuan Wu, Pengpeng Dai\*

*Department of Physics and Electronic Engineering, Xinjiang Key Laboratory of  
Luminescence Minerals and Optical Functional Materials, Xinjiang Normal  
University, 102 Xinyi Road, Urumqi 830054, China*

---

\*Corresponding author:

*E-mail address:* daipp614@nenu.edu.cn (P. Dai).

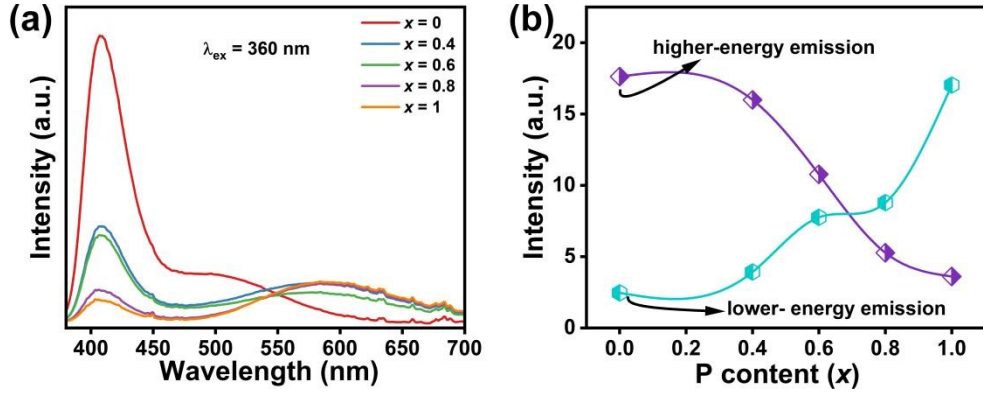

**Fig. S1** (a) PL spectra of  $\text{BaYB}_{5-x}\text{P}_x:\text{Bi}^{3+}$  ( $0 \leq x \leq 1$ ) under 360 nm excitation. (b) The higher-/lower-energy emission intensity as function of  $\text{P}^{5+}$  content.

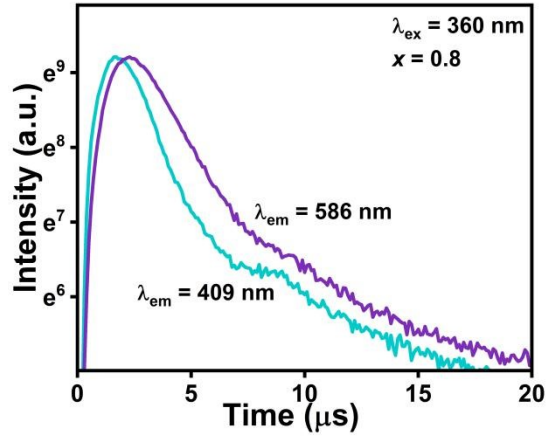

**Fig. S2** The lifetime decay curves for  $\text{Bi}^{3+}$  in the  $\text{BaYB}_{4.2}\text{P}_{0.8}:\text{Bi}^{3+}$  phosphor excited at 360 nm and monitored at 409 and 586 nm.
